1                   **Re-modeling of foliar membrane lipids in a seagrass**  
2                   **allows for growth in phosphorus deplete conditions**

3

4   Jeremy P. Koelmel<sup>1</sup>, Justin E. Campbell<sup>2</sup>, Joy Guingab-Cagmat<sup>1</sup>, Laurel Meke<sup>1</sup>, Timothy J. Garrett<sup>1</sup>,  
5   Ulrich Stingl<sup>3\*</sup>

6   <sup>1</sup> University of Florida, Department of Pathology, Immunology, and Laboratory Medicine, College  
7   of Medicine, 1395 Center Dr., Gainesville, Florida 32610, United States

8   <sup>2</sup>Florida International University, Department of Biological Sciences, 3000 NE 151<sup>st</sup> street, North  
9   Miami, FL, 33181, USA

10   <sup>3</sup>University of Florida, UF/IFAS Fort Lauderdale Research and Education Center, Department of  
11   Microbiology & Cell Science, Davie, Florida 33314, United States

12

13

14

15

16 **Abstract:**

17 We used liquid chromatography high-resolution tandem mass spectrometry to analyze the  
18 lipidome of turtlegrass (*Thalassia testudinum*) leaves with extremely high phosphorus content  
19 and extremely low phosphorus content. Most species of phospholipids were significantly down-  
20 regulated in phosphorus-deplete leaves, whereas diacylglyceryltrimethylhomoserine (DGTS),  
21 triglycerides (TG), galactolipid digalactosyldiacylglycerol (DGDG), certain species of  
22 glucuronosyldiacylglycerols (GlcADG), and certain species of sulfoquinovosyl diacylglycerol  
23 (SQDG) were significantly upregulated, explaining the change in phosphorus content as well as  
24 structural differences in leaves of plants growing under diverse phosphate concentrations. These  
25 data suggest that seagrasses are able to modify the phosphorus content in leaf membranes  
26 dependent upon environmental phosphorus availability.

27 **Main Text:**

28 Seagrasses are a widely distributed group of marine plants that provide a range of ecological  
29 services to coastal habitats around the world. Seagrass beds are in worldwide decline, mostly due  
30 to anthropogenic changes in nutrient delivery to coastal waters<sup>1</sup>. For over 30 years, it has been  
31 known that many seagrass species can display shifts in foliar phosphorus (P) content in response  
32 to environmental availability<sup>2,3</sup>, an adaptation that allows them to grow in a wide range of  
33 habitats with divergent nutrient conditions. In *Thalassia testudinum* (turtlegrass), a dominant  
34 species in South Florida,<sup>4</sup> elemental C:P ratios can differ by more than 10 fold from around 200  
35 to nearly 3000, often dependent upon environmental P availability.<sup>3,5,6</sup> *Thalassia testudinum* is  
36 distributed along the western Atlantic from Florida, USA to Venezuela, throughout the Gulf of

37 Mexico and the Caribbean Sea.<sup>7</sup> *Thalassia hemprichii*, the other species in this genus, is also  
38 widely distributed in the coastal waters of the Indian Ocean and the western Pacific.<sup>8</sup> While the  
39 morphology of turtlegrass leaves and canopy structure changes with decreased P content, areal  
40 production rates can remain relatively high,<sup>6</sup> indicating metabolically active plants. Changes in  
41 C:P ratios and P content of turtlegrass occur along natural P gradients,<sup>4,6,9</sup> but can also be induced  
42 by fertilization experiments in P-depleted habitats<sup>5,10</sup>. The exact cellular mechanisms on how  
43 turtlegrass lowers its P content are mostly unknown. In this study, we used liquid  
44 chromatography high-resolution tandem mass spectrometry (LC-HRMS/MS) to analyze the  
45 lipidome of turtlegrass leaves that contained either a high percentage of P ( $0.445 \pm 0.017\%$ ) or a  
46 low percentage of P ( $0.083 \pm 0.002\%$ ). The N, C, and P leaf content is shown in Table S1. The  
47 samples were taken from a fertilization experiment of P-limited turtlegrass in Largo Sound, FL,  
48 USA.<sup>5</sup> In total, 600 unique molecular lipid species across 36 lipid classes (supplemental table:  
49 SeaGrassData\_Supplemental.xlsx) were tentatively annotated by LipidMatch Flow<sup>11,12</sup>. The total  
50 lipidome of the samples grouped based on foliar P content without any exceptions (Figure 1).

51 Most classes of phospholipids were significantly down-regulated in P-depleted leaves including  
52 PC and PE, which were reported as the most abundant phospholipids in three species of  
53 seagrasses,<sup>13</sup> whereas diacylglyceryltrimethylhomoserine (DGTS), triglycerides (TG), galactolipid  
54 digalactosyldiacylglycerol (DGDG), certain species of glucuronosyldiacylglycerols (GlcADG), and  
55 certain species of sulfoquinovosyl diacylglycerol (SQDG) were significantly upregulated (Table 1,  
56 Figure S2) and presumably replace phospholipids in the membrane.

57 Structures of certain upregulated and downregulated lipids are shown in Figure 2, showing  
58 structural similarity between PC and DGTS, for example. It is interesting to note that total DGTS

59 had the greatest fold change increase in low P, as compared to other non-phosphorus containing  
60 membrane lipids, suggesting partial replacement of the dominant PC membrane lipid.  
61 Substitution of phospholipids by non-phosphate containing lipids was first reported in  
62 *Proteobacteria*<sup>14</sup>, where glycolipids replaced a large part of phospholipids in *Pseudomonas*  
63 *diminuta* so dramatically that in P-limited cultures, phosphate lipids were barely detectable (<  
64 0.3% of total polar lipids).

65 Since this landmark discovery, several lipid classes have been identified in a variety of diverse  
66 organisms to be involved in membrane lipid reconstructions during P starvation: SQDG was  
67 detected to substitute for phospholipids and thus to reduce P needs in *Arabidopsis* and certain  
68 species of picocyanobacteria.<sup>15–17</sup> Similar modifications of membrane lipids, but with DGDG  
69 replacing phospholipids, have been reported in oat<sup>18</sup> as well as in seven other species of  
70 monocots and dicots.<sup>19</sup> DGTS (a P-free betaine-lipid analog of PC) has been reported to replace  
71 PC in fungi.<sup>20</sup> So far, the only study revealing that membrane re-modeling is an important  
72 adaptation to low P concentrations in environmental mixed communities was reported for  
73 phytoplankton communities in the Sargasso Sea.<sup>17</sup>

74 Using LC-tandem MS and LipidMatch Flow software<sup>19,20</sup> (methods in supplemental), we were able  
75 to identify that not all molecular species in a given lipid class showed the same trend and thus  
76 the data in Table 1 only shows a simplistic overview of the changes in lipid composition  
77 (SeaGrassData\_Supplemental.xlsx and Figure S2). Under P-depleted conditions, the most  
78 significantly upregulated lipid species in *Thalassia* in terms of fold-change were actually GlcADG,  
79 SeaGrassData\_Supplemental.xlsx, which were only recently discovered in the context of P  
80 starvation in *Arabidopsis*.<sup>21</sup> Specifically GlcADG(16:0\_18:2), fold change of 21,

81 GlcADG(16:0\_16:0), fold change of 7, and GlcADG (18:0\_18:2), fold change of 7, were significantly  
82 higher under P-deplete conditions compared to high P (Figure S2). Interestingly, of the twelve  
83 GlcADG molecular species that were identified, only four were significantly upregulated  
84 (Hochberg corrected p-value < 0.05) and only the three listed above had fold changes above 2  
85 (SeaGrassData\_Supplemental.xlsx). Figure S1 shows examples of three GlcADG species identified  
86 by both MS-DIAL and LipidMatch, which had greatly differing fold changes. This impressively  
87 illustrates the use of MS and the urgent need for the identification of single molecular lipid  
88 species over other techniques that only analyze lipid classes (e.g. 2-D TLC) and explains why  
89 GlcADGs are not included in Table 1, which only shows overall changes in lipid classes.

90 Also, TGs were highly upregulated in P-deplete *Thalassia* leaves. TGs were also upregulated in  
91 nitrogen studies in the alga *Chlamydomonas reinhardtii*.<sup>22</sup> In general in starvation conditions,  
92 membrane lipids are expected to decrease due to a shift towards TG synthesis<sup>23</sup> as well as  
93 replacement by DGTS and DGDG<sup>18</sup>. We found that a significant number of DGDG species  
94 increased in P deficient seagrass leaves (Table 1, SeaGrassData\_Supplemental.xlsx). Other lipids,  
95 which were downregulated under P-deplete conditions were diglycerides (DG) and ceramides  
96 (Cer-NS), (Table 1, SeaGrassData\_Supplemental.xlsx). DGs are involved in DGTS, DGDG, and TG  
97 synthesis, all of which were upregulated in P-deficient *Thalassia* leaves. Still, more research is  
98 needed to understand the downregulation of DG and Cer-NS in P-deficient seagrass plants.

99 While the majority of the 32 SQDG species identified had fold changes greater than one  
100 (indicating upregulation; 27/32), only two were found to be significant (Hochberg corrected p-  
101 value < 0.05), namely SQDG (16:0\_18:4) and SQDG (40:11), SeaGrassData\_Supplemental.xlsx).  
102 Therefore, according to our study, SQDG had minor to no upregulation in concentration

103 compared to TG, DGDG, DGTS, and certain GlcADG species and does not play an important role  
104 in remodeling of foliar membrane lipids under different P concentrations. While we cannot  
105 completely exclude that some of the 600 detected lipids originate from epiphytes or  
106 (endo)symbionts that were not completely removed by our washing steps, we are certain that  
107 the decrease in P-containing lipids reflect changes in the seagrass lipidome as  
108 phosphatidylcholine (PC), phosphatidic acid (PA), and phosphatidylethanolamine (PE) have  
109 previously been reported to be the main P-lipids in seagrasses.

110 In conclusion, we present evidence of a key cellular mechanism employed by a widely-distributed  
111 marine plant to thrive in nutrient-poor, oligotrophic conditions. These results not only explain  
112 the cellular mechanisms driving variability in turtlegrass P content, but also may potentially  
113 explain broader shifts in leaf structure or morphology under P-limitation, as membrane fluidity  
114 may be heavily influenced by lipid re-modelling. Understanding the biology of seagrasses and  
115 their adaptation to changing nutrient concentrations can help in conservation efforts. The lipid  
116 composition of seagrasses could be used as a biomarker to identify long-term nutrient limitation,  
117 which might not be detectable from periodic monitoring of nutrient concentrations in the  
118 surrounding waters.

#### 119 Authors' contributions

120 JK analyzed the mass spec data, did the statistical analyses, and helped to write the manuscript,  
121 JC provided the samples and the nutrient data and edited the manuscript, JGC and LM performed  
122 the extractions and ran the mass spec, TG and US designed the study, JK and US wrote the  
123 manuscript. All authors read and approved the manuscript.

124 Additional information

125 The authors declare that there are no financial and/or non-financial competing interests in

126 relation to the work.

127 References:

- 128 1. Waycott, M. *et al.* Accelerating loss of seagrasses across the globe threatens coastal ecosystems.  
129 *PNAS* **106**, 12377–12381 (2009).
- 130 2. Atkinson, M. J. & Smith, S. V. C:N:P ratios of benthic marine plants1. *Limnology and Oceanography*  
131 **28**, 568–574 (1983).
- 132 3. Duarte, C. M. Seagrass nutrient content. *Marine Ecology Progress Series* **67**, 201–207 (1990).
- 133 4. Fourqurean, J. W., Zieman, J. C. & Powell, G. V. N. P limitation of primary production in Florida Bay:  
134 Evidence from C:N:P ratios of the dominant seagrass *Thalassia testudinum*. *Limnology and*  
135 *Oceanography* **37**, 162–171 (1992).
- 136 5. Campbell, J. E. *et al.* Herbivore community determines the magnitude and mechanism of nutrient  
137 effects on subtropical and tropical seagrasses. *Journal of Ecology* **106**, 401–412 (2018).
- 138 6. Barry, S. C., Jacoby, C. A. & Frazer, T. K. Environmental influences on growth and morphology of  
139 *Thalassia testudinum*. *Marine Ecology Progress Series* **570**, 57–70 (2017).
- 140 7. The IUCN Red List of Threatened Species. *IUCN Red List of Threatened Species* Available at:  
141 <https://www.iucnredlist.org/en>. (Accessed: 28th January 2019)
- 142 8. *Seagrasses: Biology, Ecology and Conservation*. (Springer Netherlands, 2006).
- 143 9. Fourqurean, J. W., Jones, R. D. & Zieman, J. C. Process Influencing Water Column Nutrient  
144 Characteristics and P Limitation of Phytoplankton Biomass in Florida Bay, FL, USA: Inferences from  
145 Spatial Distributions. *Estuarine, Coastal and Shelf Science* **36**, 295–314 (1993).
- 146 10. Armitage, A. R., Frankovich, T. A. & Fourqurean, J. W. Long-Term Effects of Adding Nutrients to an  
147 Oligotrophic Coastal Environment. *Ecosystems* **14**, 430–444 (2011).
- 148 11. LipidMatch Flow (Beta). Available at: <http://secim.ufl.edu/secim-tools/lipidmatchflow/>. (Accessed:  
149 28th January 2019)



- 150 12. Koelmel, J. P. *et al.* LipidMatch: an automated workflow for rule-based lipid identification using  
151 untargeted high-resolution tandem mass spectrometry data. *BMC Bioinformatics* **18**, 331 (2017).
- 152 13. Khotimchenko, S. V. Fatty acids and polar lipids of seagrasses from the sea of Japan. *Phytochemistry*  
153 **33**, 369–372 (1993).
- 154 14. Minnikin, D. E., Abdolrahimzadeh, H. & Baddiley, J. Replacement of acidic phospholipids by acidic  
155 glycolipids in *Pseudomonas diminuta*. *Nature* **249**, 268–269 (1974).
- 156 15. Benning, C. Biosynthesis and Function of the Sulfolipid Sulfoquinovosyl Diacylglycerol. *Annual*  
157 *Review of Plant Physiology and Plant Molecular Biology* **49**, 53–75 (1998).
- 158 16. Essigmann, B., Güler, S., Narang, R. A., Linke, D. & Benning, C. Phosphate availability affects the  
159 thylakoid lipid composition and the expression of SQD1, a gene required for sulfolipid biosynthesis  
160 in *Arabidopsis thaliana*. *Proc. Natl. Acad. Sci. U.S.A.* **95**, 1950–1955 (1998).
- 161 17. Van Mooy, B. A. S. *et al.* Phytoplankton in the ocean use non-P lipids in response to P scarcity.  
162 *Nature* **458**, 69–72 (2009).
- 163 18. Andersson, M. X., Stridh, M. H., Larsson, K. E., Liljenberg, C. & Sandelius, A. S. Phosphate-deficient  
164 oat replaces a major portion of the plasma membrane phospholipids with the galactolipid  
165 digalactosyldiacylglycerol. *FEBS Lett.* **537**, 128–132 (2003).
- 166 19. Tjellström, H., Andersson, M. X., Larsson, K. E. & Sandelius, A. S. Membrane phospholipids as a  
167 phosphate reserve: the dynamic nature of phospholipid-to-digalactosyl diacylglycerol exchange in  
168 higher plants. *Plant Cell Environ.* **31**, 1388–1398 (2008).
- 169 20. Riekhof, W. R., Naik, S., Bertrand, H., Benning, C. & Voelker, D. R. Phosphate starvation in fungi  
170 induces the replacement of phosphatidylcholine with the P-free betaine lipid diacylglycerol-N,N,N-  
171 trimethylhomoserine. *Eukaryotic Cell* **13**, 749–757 (2014).
- 172 21. Okazaki, Y. *et al.* A new class of plant lipid is essential for protection against P depletion. *Nat*  
173 *Commun* **4**, 1510 (2013).

- 174 22. Dean, A. P., Sigeo, D. C., Estrada, B. & Pittman, J. K. Using FTIR spectroscopy for rapid determination  
175 of lipid accumulation in response to nitrogen limitation in freshwater microalgae. *Bioresour.*  
176 *Technol.* **101**, 4499–4507 (2010).
- 177 23. Hu, Q. *et al.* Microalgal triacylglycerols as feedstocks for biofuel production: Perspectives and  
178 advances. *The Plant Journal* **54**, 621–639 (2008).
- 179
- 180

181 **Tables:**

182 **Table 1:** Up- and down-regulated lipid classes based on a fisher's exact test (see supplementary methods  
183 for details). Lipids in bold contain a phosphate group.

184

| Lipid class | Fisher's P-value | Up or down-regulated* | Fold Change (low/high P) | T-Test P-value** |
|-------------|------------------|-----------------------|--------------------------|------------------|
| <b>PE</b>   | 0.00002          | Down                  | 0.6                      | 0.006            |
| <b>PC</b>   | 0.00010          | Down                  | 0.5                      | 0.003            |
| <b>PA</b>   | 0.00035          | Down                  | 0.5                      | 0.017            |
| DG          | 0.00053          | Down                  | 0.5                      | 0.003            |
| <b>LPC</b>  | 0.00069          | Down                  | 0.6                      | 0.017            |
| <b>OxPG</b> | 0.00080          | Down                  | 0.5                      | 0.011            |
| Cer-NS      | 0.00443          | Down                  | 0.6                      | 0.004            |
| DGTS        | < 0.00001        | Up                    | 1.8                      | 0.014            |
| TG          | < 0.00001        | Up                    | 1.1                      | 0.176            |
| DGDG        | 0.00727          | Up                    | 1.2                      | 0.204            |
| OxTG        | 0.03723          | Up                    | 1.4                      | 0.001            |

185 \*Up-regulated and down-regulated mean that the lipids were higher or lower, respectively, in leaves with low phosphorus content  
186 versus leaves with high phosphorus content based on fisher's exact test.

187 \*\*T-test (unequal variance, two-sided) of total intensities for sum of lipid class

188

189 **Figure legends:**

190

191 Figure 1: Principal Component Analysis of the total lipidome of samples with high phosphorous content  
192 (orange) versus samples with low phosphorous content (blue; normalized by sum, log transformed and  
193 mean centered). PC1 explained 43.5% of the variation, and PC2 explained 13.9% of the variation.

194

195 Figure 2: Examples of downregulated phospholipids that are key lipid species within the cell membrane,  
196 and significantly upregulated lipids that do not contain phosphorus. Lipid acronyms are defined as  
197 follows: phosphatidylcholine (PC), phosphatidic acid (PA), phosphatidylethanolamine (PE),  
198 diacylglyceryltrimethylhomoserine (DGTS), glucuronosyldiacylglycerols (GlcADG), and galactolipid  
199 digalactosyldiacylglycerol (DGDG).

200 \*for GlcADG only a few molecular lipid species were significantly upregulated

201

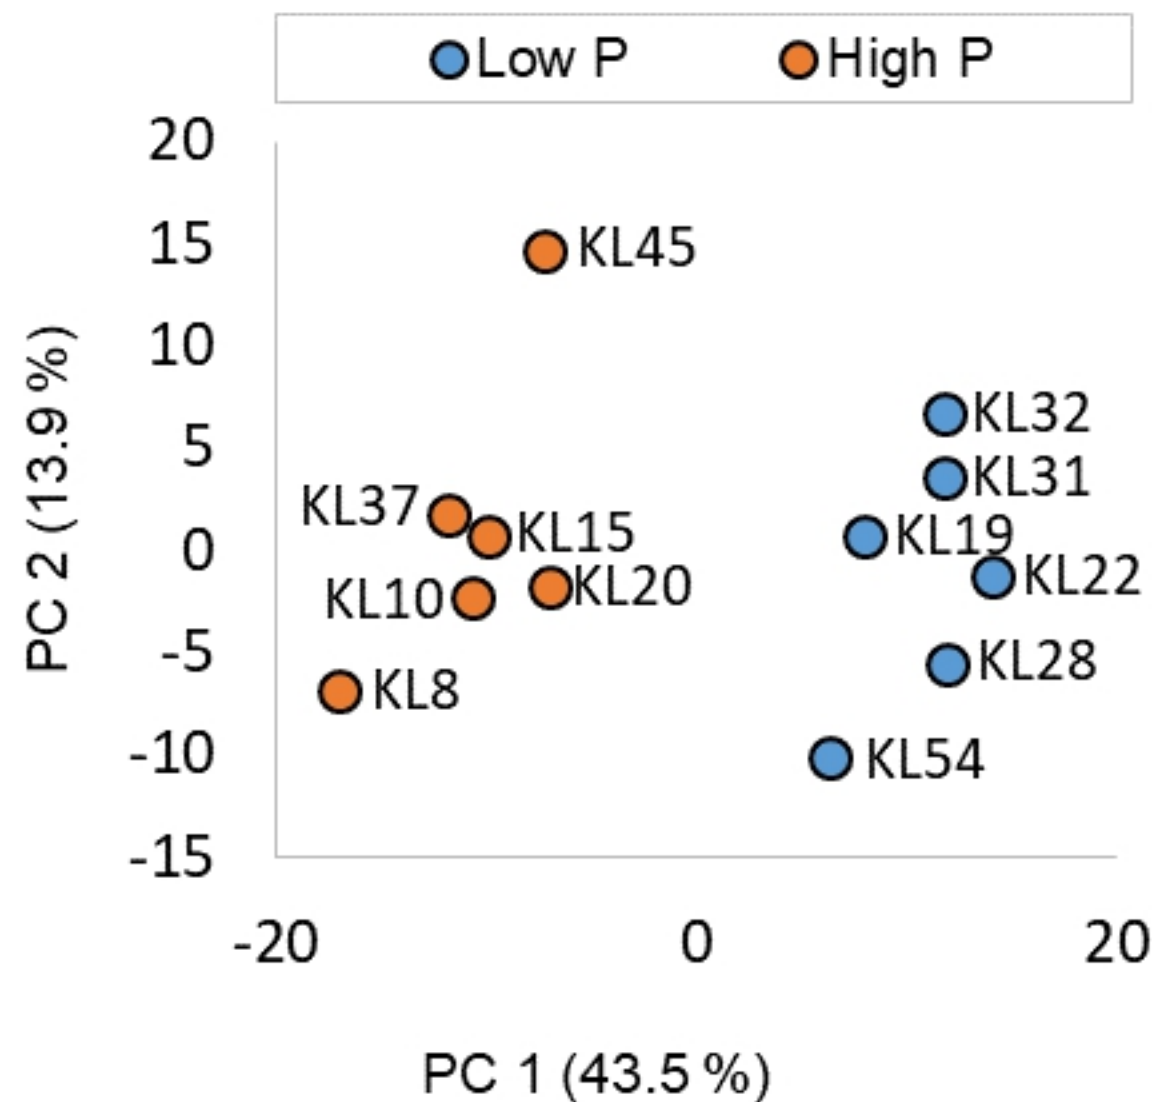

Figure 1

Downregulated in low P

Upregulated in low P

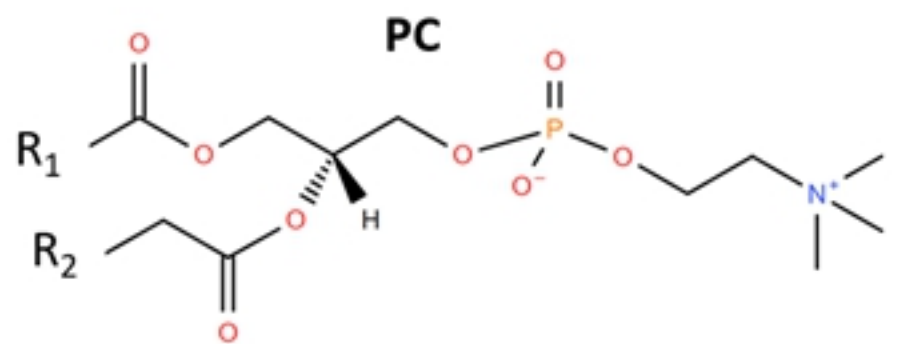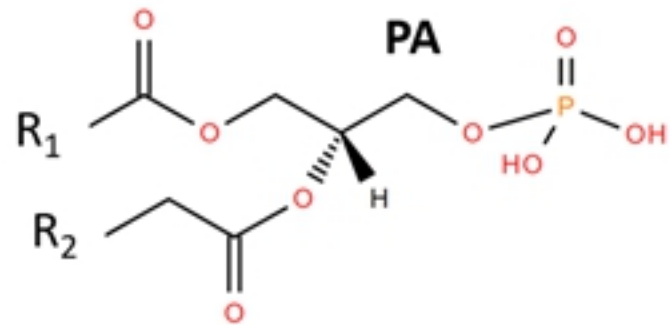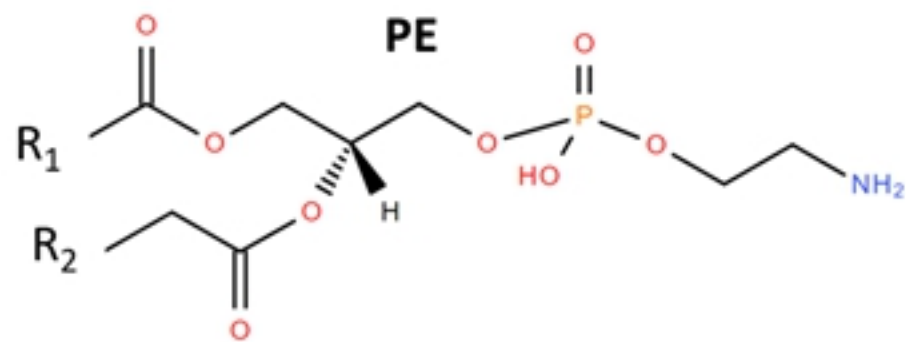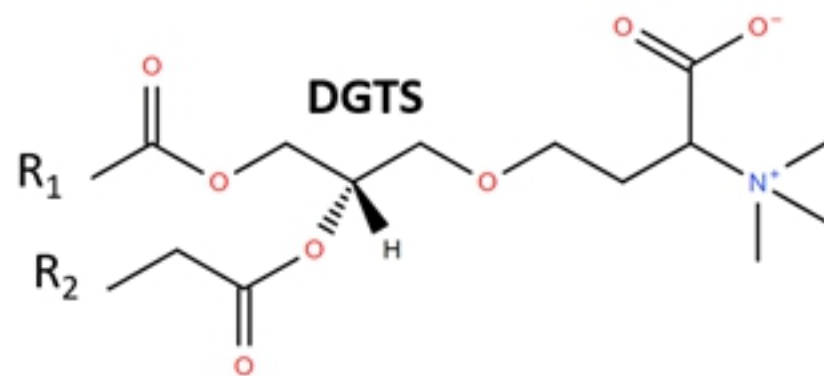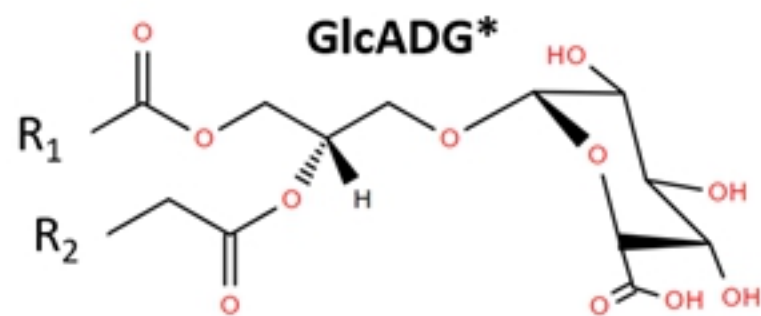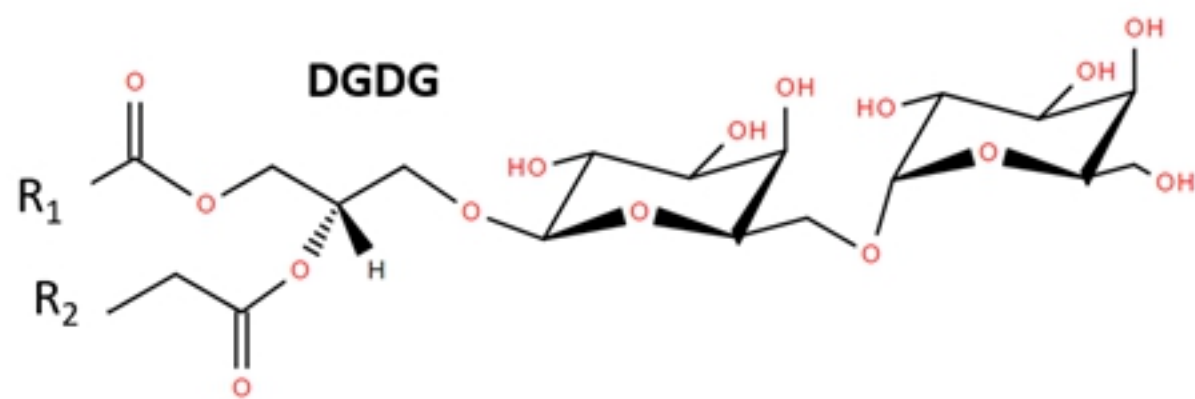

Figure 2
